# Supplementary material for: Oral Hygiene Practices and Knowledge among Adolescents Aged between 15 and 17 Years Old during Fixed Orthodontic Treatment: Multicentre Study Conducted in France
Source: MDPI journal article supplement (doi:10.3390/ijerph19042316), 2022-02-17
Supplement: s1 [file s1]

# Oral hygiene practices and knowledge among adolescents aged between 15 and 17 years old during fixed orthodontic treatment: multicentre study conducted in France

Camille Inquimbert, Celine Clement, Antoine Couatarmanach, Paul Tramini, Denis Bourgeois, Florence Carrouel

**Supplementary Table S1.** Knowledge of adolescents regarding prevention of oral diseases according to orthodontic treatment. n: number of adolescents.

| Variable                                  |                  | No orthodontic treatment<br>(n = 266) | Orthodontic treatment<br>(n = 166) | p-value (*)<br>(chi-square) |
|-------------------------------------------|------------------|---------------------------------------|------------------------------------|-----------------------------|
| Frequency of daily toothbrushing          | Less than twice  | 3.6%                                  | 4.9%                               | 0.909                       |
|                                           | Twice            | 43.5%                                 | 43.3%                              |                             |
|                                           | More than twice  | 52.9%                                 | 51.8%                              |                             |
| Duration of toothbrushing                 | 1 minute or less | 0.4%                                  | 0.0%                               | 0.231                       |
|                                           | 2 minutes        | 6.6%                                  | 6.0%                               |                             |
|                                           | 3 minutes        | 21.7%                                 | 30.1%                              |                             |
|                                           | > 3 minutes      | 59.7%                                 | 55.4%                              |                             |
|                                           | I don't know     | 11.1%                                 | 7.8%                               |                             |
| Snacking reduces caries                   | No               | 80.5%                                 | 76.5%                              | 0.330                       |
|                                           | Yes              | 9.7%                                  | 12.1%                              |                             |
|                                           | I don't know     | 0%                                    | 0%                                 |                             |
| Sticky food protects from decay           | No               | 92.9%                                 | 96.4%                              | 0.319                       |
|                                           | Yes              | 1.8%                                  | 1.2%                               |                             |
|                                           | I don't know     | 5.3%                                  | 2.4%                               |                             |
| Fluoride toothpaste prevents calculus     | No               | 12.4%                                 | 13.3%                              | 0.578                       |
|                                           | Yes              | 37.6%                                 | 48.2%                              |                             |
|                                           | I don't know     | 50.0%                                 | 38.6%                              |                             |
| Fluoride toothpaste makes teeth white     | No               | 14.6%                                 | 18.1%                              | 0.880                       |
|                                           | Yes              | 44.3%                                 | 52.4%                              |                             |
|                                           | I don't know     | 41.2%                                 | 29.5%                              |                             |
| Fluoride toothpaste provides fresh breath | No               | 22.6%                                 | 24.1%                              | 0.635                       |
|                                           | Yes              | 32.7%                                 | 39.8%                              |                             |
|                                           | I don't know     | 44.7%                                 | 36.1%                              |                             |
| Fluoride toothpaste prevents decay        | No               | 12.0%                                 | 7.2%                               | 0.001                       |
|                                           | Yes              | 46.0%                                 | 65.1%                              |                             |
|                                           | I don't know     | 42.0%                                 | 27.7%                              |                             |

(\*) p-values were calculated without considering the answer 'I don't know'

**Supplementary Table S2.** Oral hygiene, nutrition, and harmful habits among adolescents aged between 15 and 17 years old according to orthodontic treatment. n: number of adolescents.

| Variable              | No orthodontic treatment<br>(n = 266) | Orthodontic treatment<br>(n = 166) | p-value (*)<br>(chi-square) |
|-----------------------|---------------------------------------|------------------------------------|-----------------------------|
| Dental floss use      |                                       |                                    | 0.635                       |
|                       | Often                                 | 0.9%                               | 1.2%                        |
|                       | Sometimes                             | 7.5%                               | 6.0%                        |
|                       | Rarely                                | 11.5%                              | 15.7%                       |
|                       | Never                                 | 78.8%                              | 76.5%                       |
|                       | I don't know                          | 1.3%                               | 0.6%                        |
| Interdental brush use |                                       |                                    | <0.001                      |
|                       | Often                                 | 0.4%                               | 12.1%                       |
|                       | Sometimes                             | 4.0%                               | 23.0%                       |
|                       | Rarely                                | 12.0%                              | 13.9%                       |
|                       | Never                                 | 81.9%                              | 48.5%                       |
|                       | I don't know                          | 1.8%                               | 2.4%                        |
| Frequency of snacking |                                       |                                    | 0.237                       |
|                       | Less than 3 times                     | 2.2%                               | 3.0%                        |
|                       | 3 times                               | 11.1%                              | 11.5%                       |
|                       | 4 times                               | 23.5%                              | 33.1%                       |
|                       | 5 times                               | 23.9%                              | 18.7%                       |
|                       | More than 5 times                     | 39.4%                              | 33.7%                       |
| Fizzy drinks          |                                       |                                    | 0.040                       |
|                       | Often                                 | 48.7%                              | 39.8%                       |
|                       | Sometimes                             | 38.5%                              | 39.2%                       |
|                       | Rarely                                | 8.9%                               | 18.1%                       |
|                       | Never                                 | 4.0%                               | 3.0%                        |
|                       | I don't know                          | 0.0%                               | 0.0%                        |
| Sweets                |                                       |                                    | 0.167                       |
|                       | Often                                 | 33.6%                              | 24.7%                       |
|                       | Sometimes                             | 38.9%                              | 45.2%                       |
|                       | Rarely                                | 22.6%                              | 27.1%                       |
|                       | Never                                 | 4.9%                               | 3.0%                        |
|                       | I don't know                          | 0.0%                               | 0.0%                        |
| Fast foods            |                                       |                                    | 0.027                       |
|                       | Often                                 | 25.8%                              | 15.1%                       |
|                       | Sometimes                             | 40.9%                              | 42.2%                       |
|                       | Rarely                                | 29.3%                              | 34.3%                       |
|                       | Never                                 | 4.0%                               | 8.4%                        |
|                       | I don't know                          | 0.0%                               | 0.0%                        |
| Cigarettes            |                                       |                                    | 0.002                       |
|                       | Often                                 | 11.1%                              | 4.2%                        |
|                       | Sometimes                             | 6.7%                               | 2.4%                        |
|                       | Rarely                                | 9.8%                               | 4.8%                        |
|                       | Never                                 | 72.4%                              | 88.0%                       |
|                       | I don't know                          | 0.0%                               | 0.6%                        |
| Drugs                 |                                       |                                    | 0.422                       |
|                       | Often                                 | 0.4%                               | 1.2%                        |
|                       | Sometimes                             | 3.5%                               | 1.8%                        |
|                       | Rarely                                | 3.5%                               | 1.8%                        |
|                       | Never                                 | 92.5%                              | 94.6%                       |
|                       | I don't know                          | 0.0%                               | 0.6%                        |
| Alcohol               |                                       |                                    | 0.226                       |
|                       | Often                                 | 2.2%                               | 2.4%                        |
|                       | Sometimes                             | 23.0%                              | 17.5%                       |
|                       | Rarely                                | 22.6%                              | 17.5%                       |
|                       | Never                                 | 52.2%                              | 62.1%                       |
|                       | I don't know                          | 0.0%                               | 0.6%                        |

(\*) p-values were calculated without considering the answer 'I don't know'

**Supplementary Table S3.** Self-perception of oral and general health according to orthodontic treatment. n: number of adolescents.

| Variable                      | No orthodontic treatment<br>(n = 266) | Orthodontic treatment<br>(n = 166) | p-value (*)<br>(chi-square) |
|-------------------------------|---------------------------------------|------------------------------------|-----------------------------|
| Difficulty eating             |                                       |                                    | 0.068                       |
| Often                         | 4.4%                                  | 3.0%                               |                             |
| Sometimes                     | 11.1%                                 | 13.3%                              |                             |
| Rarely                        | 23.0%                                 | 33.7%                              |                             |
| Never                         | 61.5%                                 | 49.4%                              |                             |
| I don't know                  | 0.0%                                  | 0.6%                               |                             |
| Difficulty chewing            |                                       |                                    | 0.002                       |
| Often                         | 3.5%                                  | 3.0%                               |                             |
| Sometimes                     | 9.4%                                  | 14.5%                              |                             |
| Rarely                        | 21.0%                                 | 34.9%                              |                             |
| Never                         | 66.1%                                 | 47.0%                              |                             |
| I don't know                  | 0.0%                                  | 0.6%                               |                             |
| Toothache                     |                                       |                                    | 0.152                       |
| Often                         | 6.6%                                  | 3.0%                               |                             |
| Sometimes                     | 17.3%                                 | 24.7%                              |                             |
| Rarely                        | 34.5%                                 | 36.8%                              |                             |
| Never                         | 41.2%                                 | 35.5%                              |                             |
| I don't know                  | 0.4%                                  | 0.0%                               |                             |
| Embarrassed about their teeth |                                       |                                    | 0.007                       |
| Often                         | 8.1%                                  | 10.3%                              |                             |
| Sometimes                     | 8.5%                                  | 18.8%                              |                             |
| Rarely                        | 13.8%                                 | 15.1%                              |                             |
| Never                         | 67.4%                                 | 55.8%                              |                             |
| I don't know                  | 2.2%                                  | 0.0%                               |                             |

(\*) p-values were calculated without considering the answer 'I don't know'
