# Supplementary material for: Oral Hygiene Practices and Knowledge among Adolescents Aged between 15 and 17 Years Old during Fixed Orthodontic Treatment: Multicentre Study Conducted in France
Source: MDPI journal article supplement (doi:10.3390/ijerph19042316), 2022-02-17
Supplement: s1 [file s1]

# Questionnaire on practices and knowledge of oral hygiene

## PATIENT CHARACTERISTICS

1. Date of birth
2. Sex ☐ Female ☐ Male
3. How tall are you?      ft/in cm
4. How much do you weigh?      lbs (Kg)
5. Postal code/ZIP
6. Where do you study? ☐ Middle School ☐ High school ☐ Technical High School ☐ Other ..... ☐ Don't know
7. What is your father's occupation? .....
8. What is your mother's occupation? .....
9. Who do you live with? ☐ Your two parents ☐ Your mother ☐ Your father ☐ Alternately ☐ Other
10. Do you have any siblings? ☐ Yes ☐ No ☐ Don't know  
 If "yes", how many?     
 Which child are you ☐ Eldest(1<sup>st</sup>) ☐ 2<sup>nd</sup> ☐ 3<sup>rd</sup> ☐ 4<sup>th</sup> ☐ 5<sup>th</sup> ☐ Other
11. Are you a beneficiary of any of the following?
 

|                                                   | Yes                      | No                       | Don't know               |
|---------------------------------------------------|--------------------------|--------------------------|--------------------------|
| Universal Health Coverage (CMU in French)         | <input type="checkbox"/> | <input type="checkbox"/> | <input type="checkbox"/> |
| Complementary Health Insurance (ACS in French)    | <input type="checkbox"/> | <input type="checkbox"/> | <input type="checkbox"/> |
| Continuous access to health care (PASS in French) | <input type="checkbox"/> | <input type="checkbox"/> | <input type="checkbox"/> |
| State medical assistance (AME in French)          | <input type="checkbox"/> | <input type="checkbox"/> | <input type="checkbox"/> |
| Other                                             | <input type="checkbox"/> | <input type="checkbox"/> | <input type="checkbox"/> |

## CHARACTERISTICS OF THE CONSULTATION

12. When did you last visit a dentist?  
☐ < 1 year ☐ < 2 years ☐ < 5 years ☐ > or = 5 years ☐ Never ☐ Don't know
13. What was the reason for your last dental visit?  
☐ Checkup, consultation ☐ Cleaning ☐ Emergency  
☐ Care, followed by regular treatment ☐ Other:.....
14. What is the reason for your visit today?  
☐ Checkup, consultation ☐ Cleaning ☐ Emergency  
☐ Care, followed by regular treatment ☐ Other:.....

15. In the last 12 months, how often have you done the following...?

|                                                                    | Often                    | Sometimes                | Rarely                   | Never                    | Don't know               |
|--------------------------------------------------------------------|--------------------------|--------------------------|--------------------------|--------------------------|--------------------------|
| Found it difficult to eat                                          | <input type="checkbox"/> |
| Had toothache because of sensitive teeth                           | <input type="checkbox"/> |
| Had difficulty chewing or biting food                              | <input type="checkbox"/> |
| Had toothache                                                      | <input type="checkbox"/> |
| Had bleeding gums                                                  | <input type="checkbox"/> |
| Felt embarrassed because of the appearance of your teeth           | <input type="checkbox"/> |
| Avoided talking because of the appearance of your teeth or denture | <input type="checkbox"/> |

## ORAL HEALTH, HABITS AND RISK FACTORS

*I will now ask you some questions about your dental and food habits...*

16. How often do you brush your teeth per day?

17. What type of toothbrush do you use?

☐ Manual ☐ Electric ☐ Both ☐ Don't know

18. What are your toothbrush bristles like? ☐ Soft ☐ Medium ☐ Firm ☐ Don't know

19. How often do you replace your toothbrush? ☐ Every 0-3 months ☐ 3 - 6 months ☐ > 6 months ☐ Don't know

20. What is the name of your toothpaste? ..... ☐ Don't know

21. Do you use...?

|                   | Often                    | Sometimes                | Rarely                   | Never                    | Don't know               |
|-------------------|--------------------------|--------------------------|--------------------------|--------------------------|--------------------------|
| Dental floss      | <input type="checkbox"/> |
| Interdental brush | <input type="checkbox"/> |
| Mouthwash         | <input type="checkbox"/> |

22. Who taught you how to brush your teeth?

☐ Parents ☐ Dentist ☐ School ☐ No one ☐ Other..... ☐ Don't know

23. How often do you eat/drink per day, even in small amounts?

24. At what time(s) do you brush your teeth (multiple answers possible)?

☐ Before breakfast ☐ After breakfast ☐ After lunch  
☐ After dinner ☐ Other (specify):..... ☐ Don't know

## 25. About your habits....

|                                            | Often                    | Sometimes                | Rarely                   | Never                    | Don't know               |
|--------------------------------------------|--------------------------|--------------------------|--------------------------|--------------------------|--------------------------|
| Do you ever eat:                           | <input type="checkbox"/> |
| Sweet or carbonated drinks?                | <input type="checkbox"/> |
| Chewing gum?                               | <input type="checkbox"/> |
| Sweets?                                    | <input type="checkbox"/> |
| Fast food?                                 | <input type="checkbox"/> |
| Do you or have you ever smoked cigarettes? | <input type="checkbox"/> |
| Do you take drugs?                         | <input type="checkbox"/> |
| Do you drink alcohol?                      | <input type="checkbox"/> |
| Do you exercise?                           | <input type="checkbox"/> |

*I will now ask you some questions about products that could improve the health of your teeth. According to you:*

26. What is the minimum number of times per day you should brush your teeth? |\_\_|\_\_|

27. Effective teeth brushing should last...

☐ < 1 min    ☐ 1 min    ☐ 2 min    ☐ 3 min    ☐ > 3 min    ☐ Don't know

28. Does snacking between meals reduce the risk of cavities?

☐ Yes    ☐ No    ☐ Don't know

29. Does the consumption of sticky foods (chips, sweets, etc.) protect teeth from decay?

☐ Yes    ☐ No    ☐ Don't know

30. What is the minimum number of times you should visit a dentist per year? |\_\_|\_\_|

31. Toothpaste should contain fluoride to:

|                                      | Yes                      | No                       | Don't know               |
|--------------------------------------|--------------------------|--------------------------|--------------------------|
| Prevent the appearance of calculus ? | <input type="checkbox"/> | <input type="checkbox"/> | <input type="checkbox"/> |
| Make your teeth white?               | <input type="checkbox"/> | <input type="checkbox"/> | <input type="checkbox"/> |
| Have fresh breath?                   | <input type="checkbox"/> | <input type="checkbox"/> | <input type="checkbox"/> |
| Reduce the appearance of cavities?   | <input type="checkbox"/> | <input type="checkbox"/> | <input type="checkbox"/> |

32. Have you ever had any cavities? ☐ Yes    ☐ No    ☐ Don't know

33. Are you currently receiving orthodontic treatment? ☐ Yes    ☐ No    ☐ Don't know

34. Have you had orthodontic treatment in the past? ☐ Yes    ☐ No    ☐ Don't know

35. Have you ever had a consultation with an orthodontist? ☐ Yes    ☐ No    ☐ Don't know

## QUALITY OF LIFE

36. How do you currently consider the following...?

|                            | Very good                | Good                     | Average                  | Bad                      | Very bad                 | Don't know               |
|----------------------------|--------------------------|--------------------------|--------------------------|--------------------------|--------------------------|--------------------------|
| Your general health status | <input type="checkbox"/> |
| Your dental health status  | <input type="checkbox"/> |
| Your gum health status     | <input type="checkbox"/> |
